# Supplementary material for: Lumbar segmental mobility disorders: comparison of two methods of defining abnormal displacement kinematics in a cohort of patients with non-specific mechanical low back pain
Source: Springer Nature journal article supplement (doi:10.1186/1471-2474-7-45), 2006-05-19

## Additional files

### Section 1 - Distribution of sagittal rotation data for all segments (L2-S1) of the asymptomatic reference sample, with a Normal probability curve overlaid.

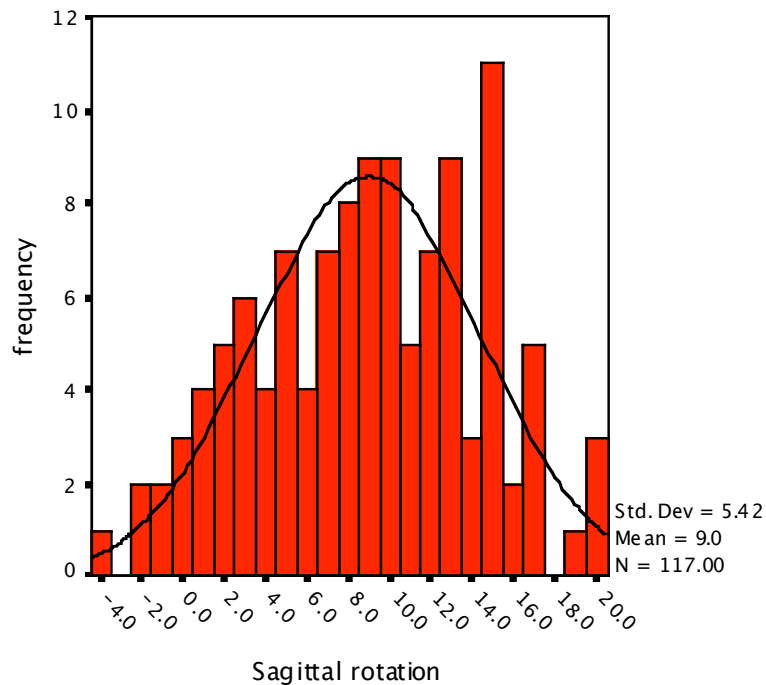

### Section 2 - Distribution of sagittal translation data for all segments (L2-S1) of the asymptomatic reference sample, with a Normal probability curve overlaid.

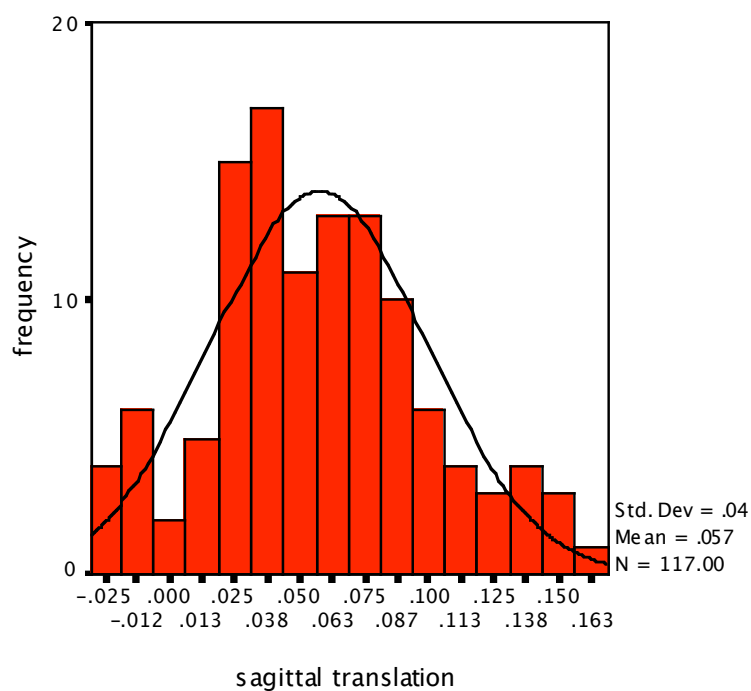

**Section 3 - Distribution of sagittal rotation mobility data for all segments (L2-S1) from the RCLBP cohort, with a Normal probability curve overlaid.**

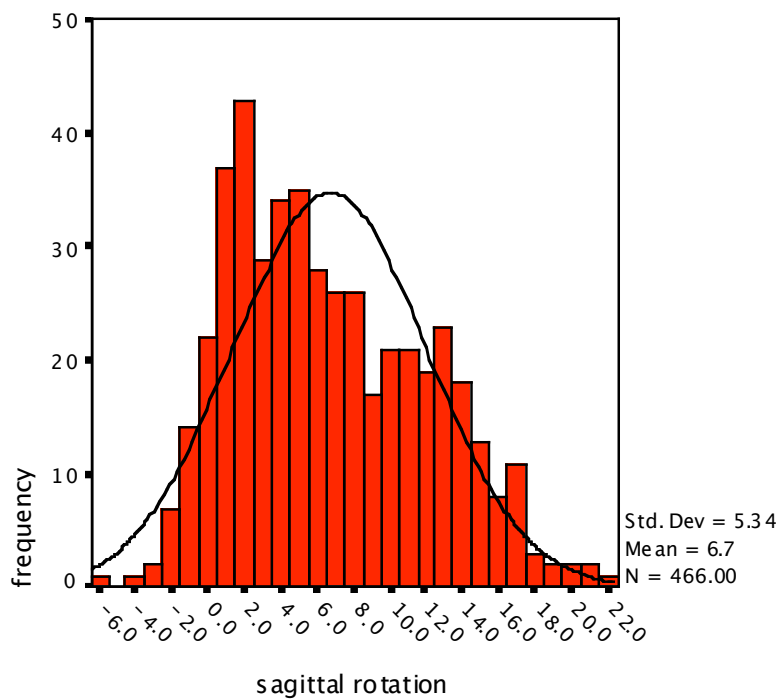

**Section 4 Distribution of sagittal translation mobility data for all segments (L2-S1) from the RCLBP cohort, with a Normal probability curve overlaid.**

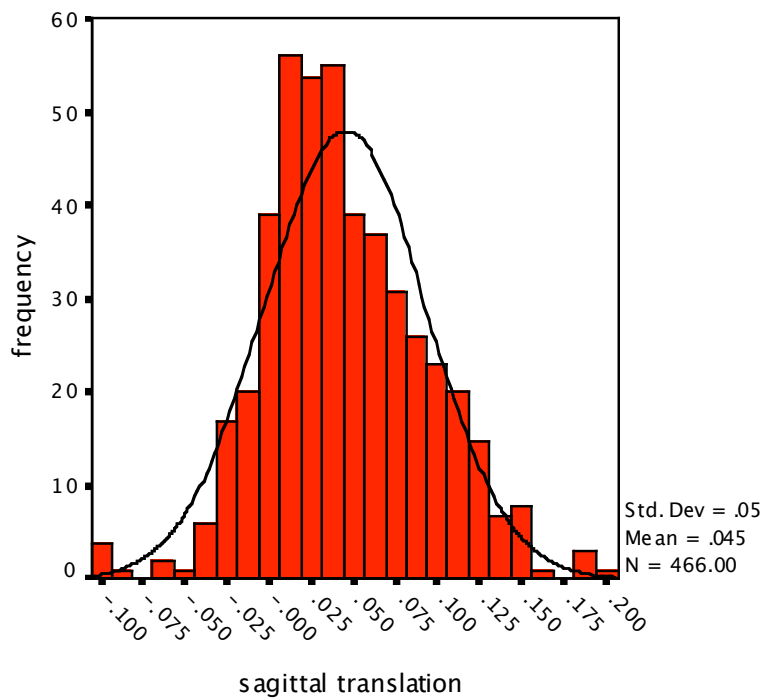

### Section 5 – Rotation L2-3: RCLBP cohort

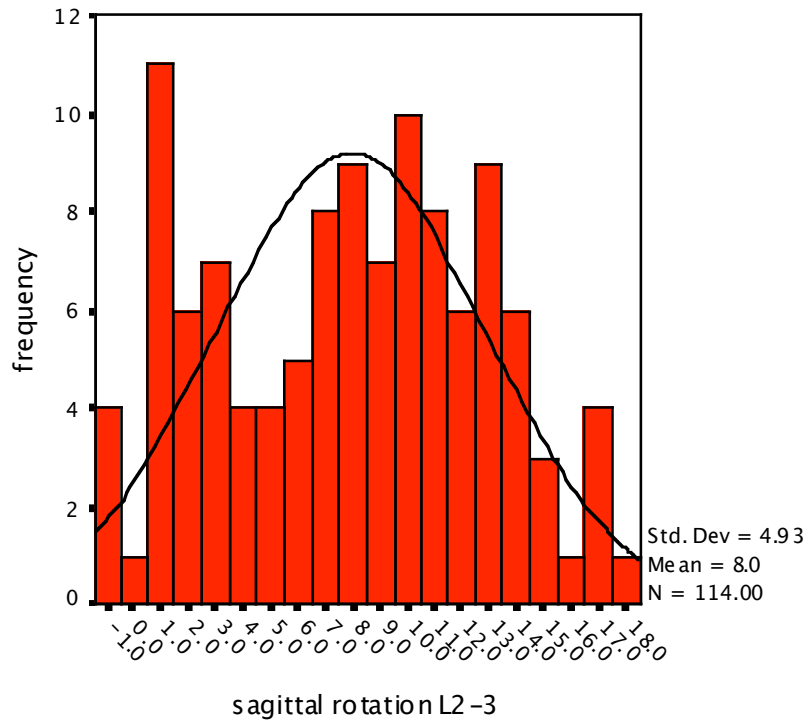

### Section 6 - Translation L2-3: RCLBP cohort

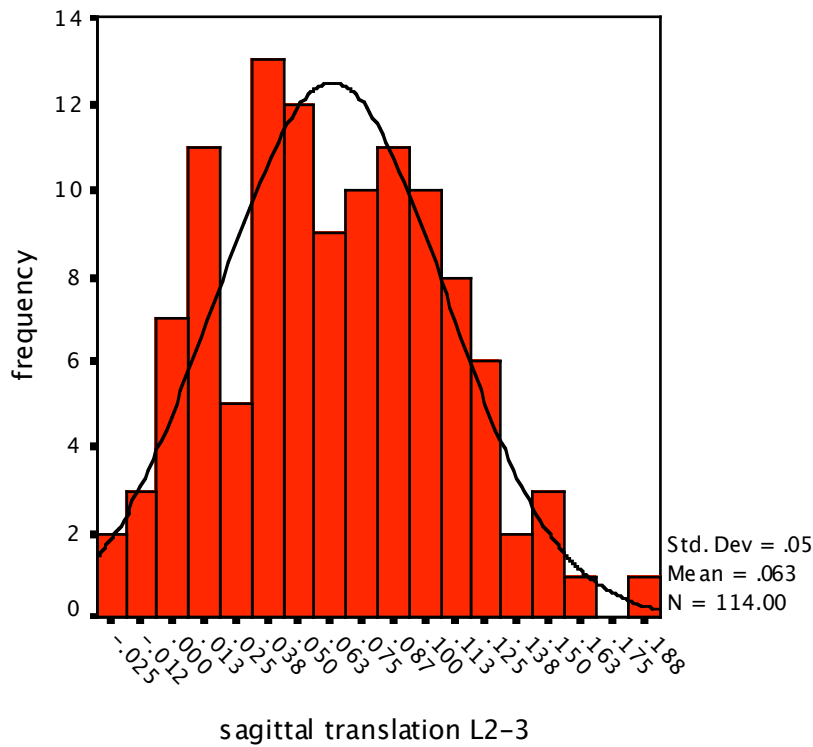

### Section 7 - Rotation L3-4: RCLBP cohort

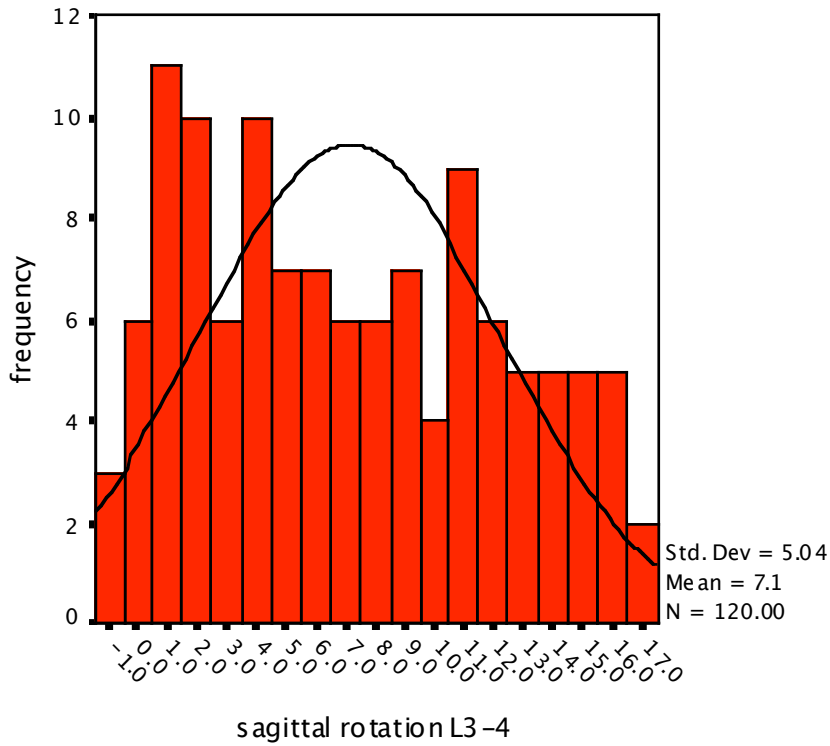

### Section 8 - Translation L3-4: RCLBP cohort

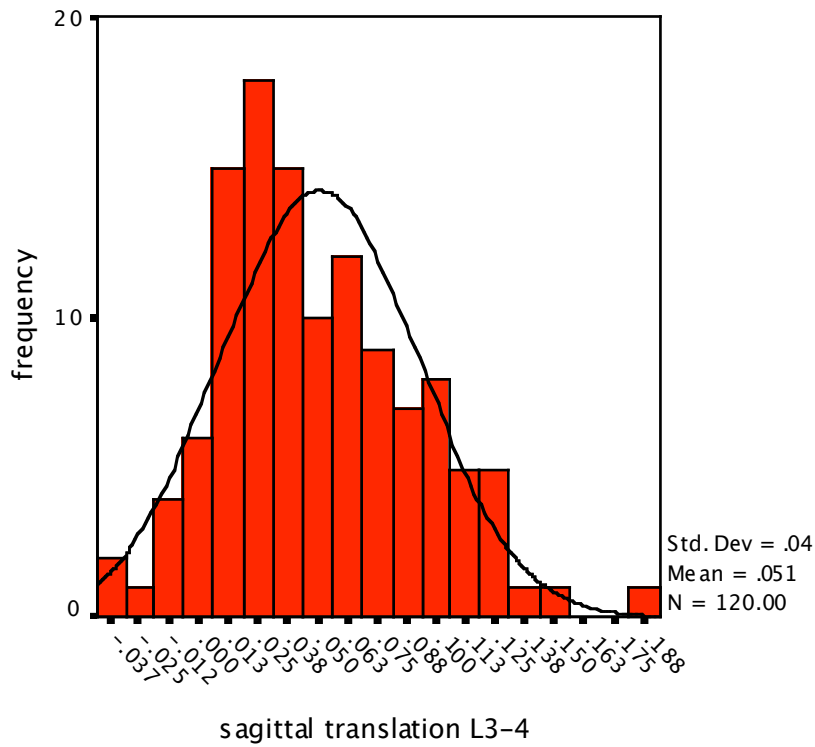

### Section 9 - Rotation L4-5: RCLBP cohort

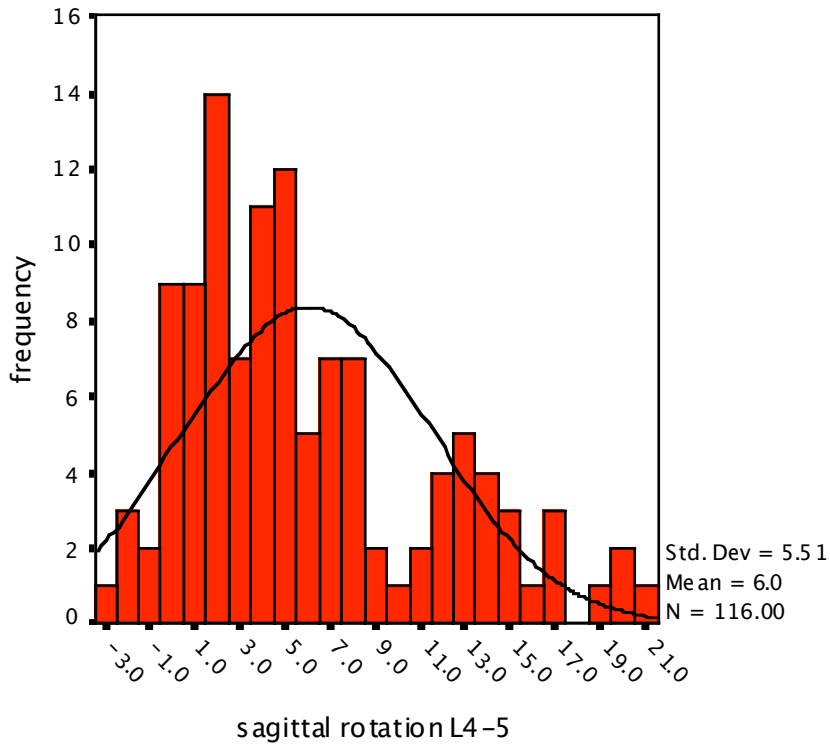

### Section 10 - Translation L4-5: RCLBP cohort

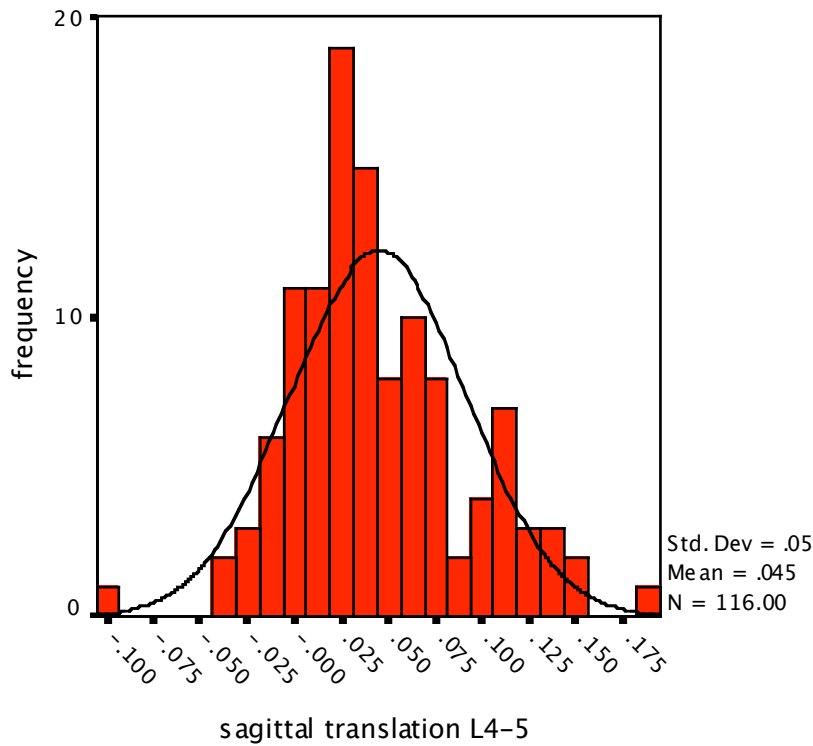

### Section 11 - Rotation L5-S1: RCLBP cohort

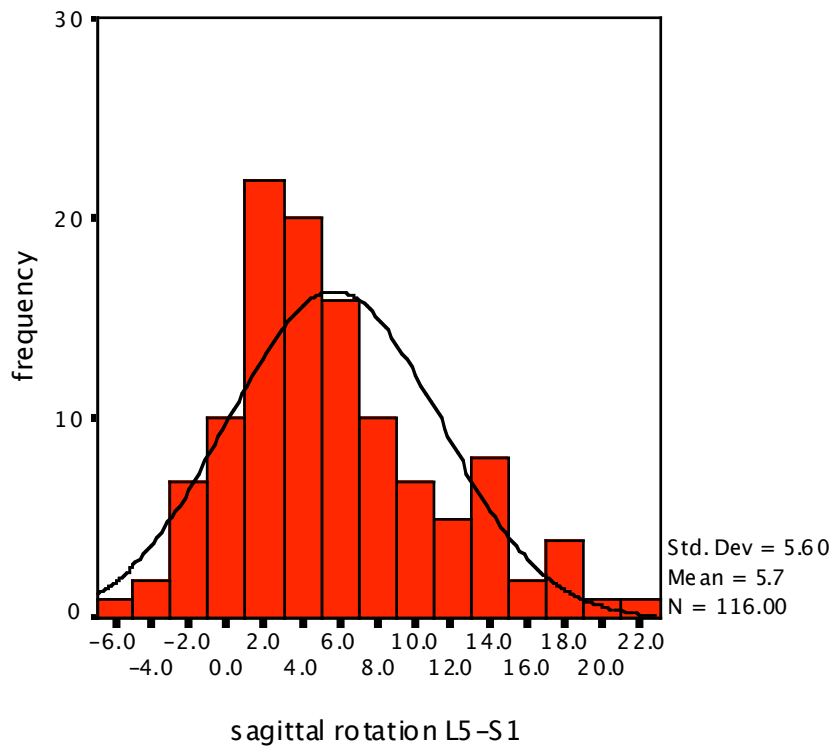

### Section 12 - Translation L5-S1: RCLBP cohort

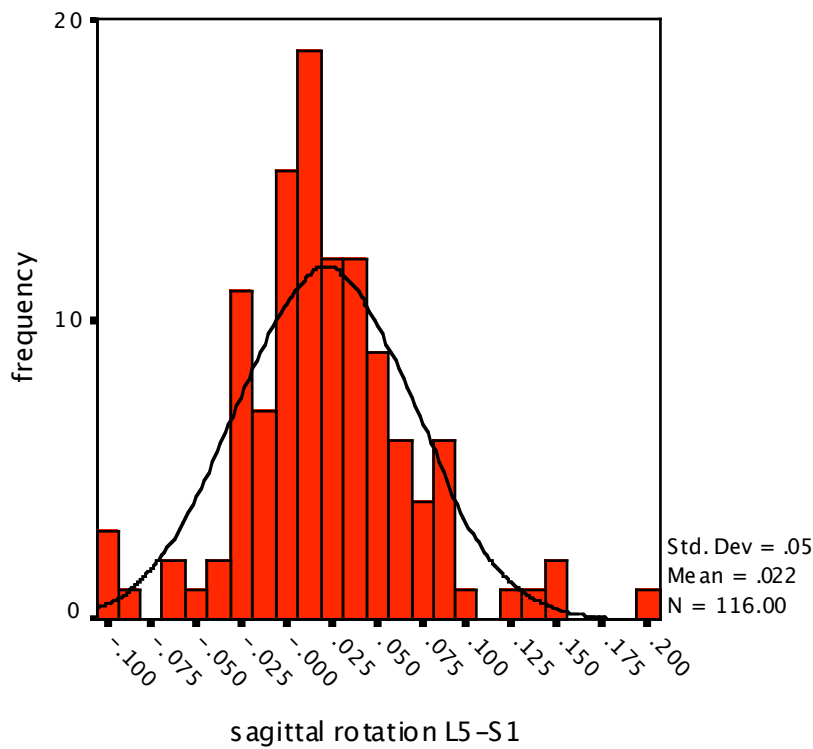

Supplement: Additional file 1 [file 1471-2474-7-45-s1.pdf]
